# Supplementary material for: Development of a selective methodology for methylmercury quantification and evaluation of its accumulation in hippocampus
Source: Royal Society of Chemistry journal article supplement (doi:10.1039/d3ja00413a), 2024-11-21
Supplement: d3ja00413a1.pdf [file d3ja00413a1.pdf]

### SUPPLEMENTARY MATERIAL

S.Fig 1. Surface plot of MeHg<sup>+</sup> area obtained through the optimization Box Behnken model for the derivatization and LPME process. Hold values of a) Agitation time (25 min) b) Agitation speed (400 rpm) and c) pH (3,5).

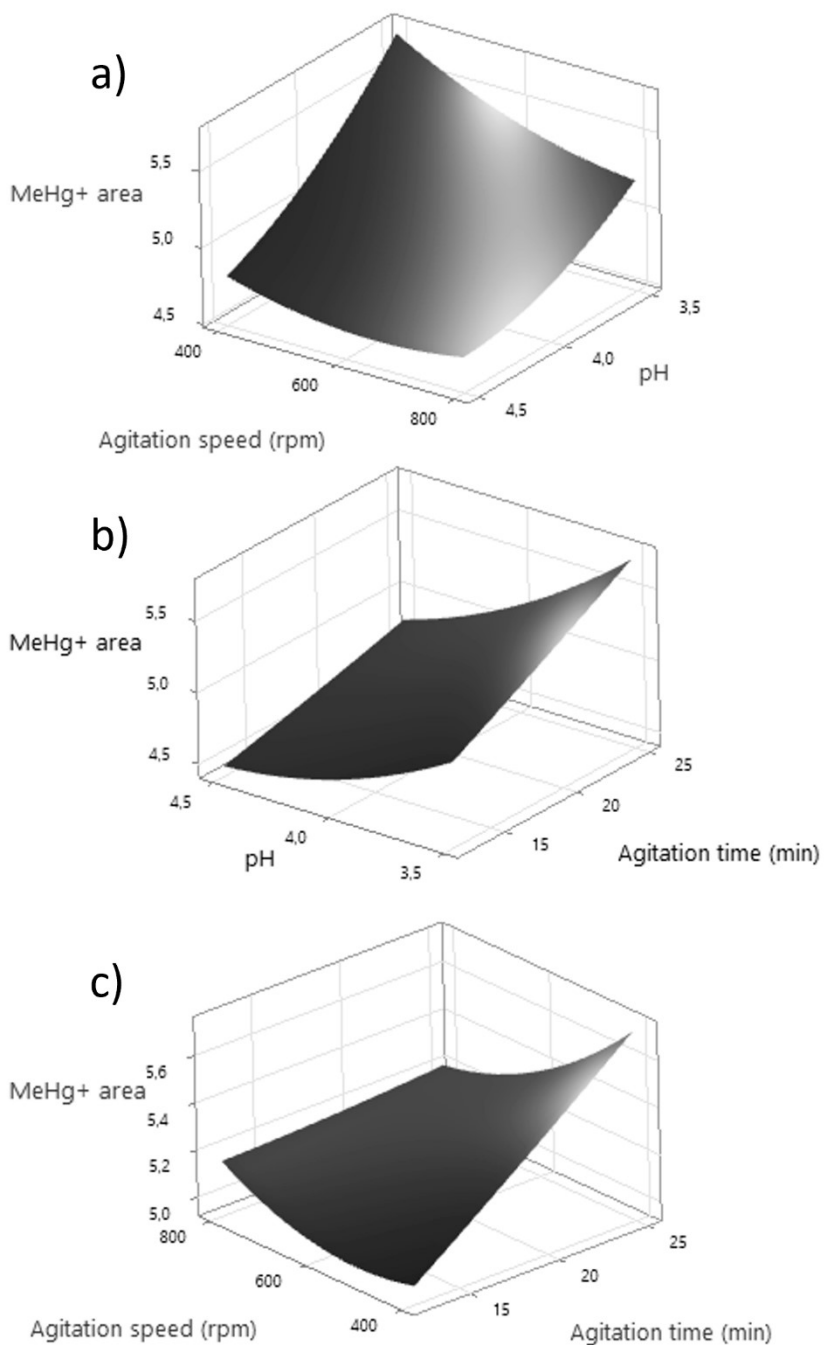

S.Fig 2. Pareto Chart of the variables considered in the Composite central design to the optimization of MAE process ( $\alpha = 0.05$ ). Positive effect: gray bars. Negative effect: white bars.

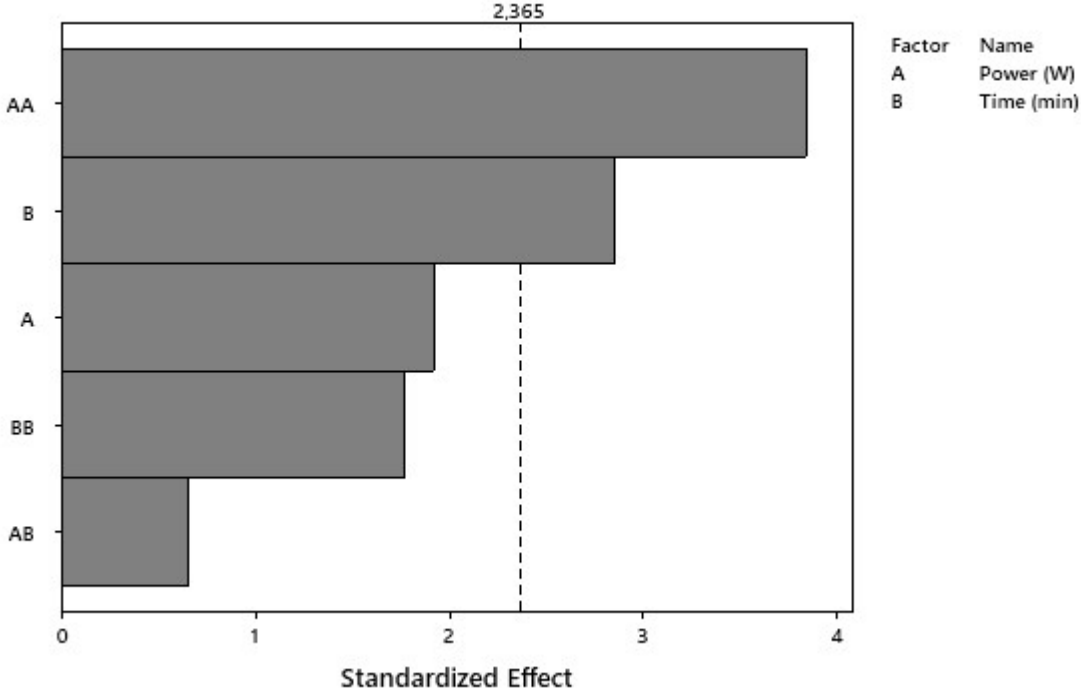

S.Table 1. Plackett Burman experimental design for the screening of Derivatization and LPME process.

| Agitation time (min) | Deriv. agent (%) | pH  | Buffer concentration (M) | Temperature (°C) | Agitation speed (rpm) | Solvent                                       | Area   |
|----------------------|------------------|-----|--------------------------|------------------|-----------------------|-----------------------------------------------|--------|
| 20,0                 | 0,1              | 5,0 | 1,0                      | 20,0             | 700                   | CH <sub>2</sub> Cl <sub>2</sub>               | 6,0580 |
| 5,0                  | 0,3              | 5,0 | 0,4                      | 35,0             | 100                   | CH <sub>2</sub> Cl <sub>2</sub>               | 5,8032 |
| 12,5                 | 0,2              | 4,5 | 0,7                      | 27,5             | 400                   | C <sub>2</sub> H <sub>4</sub> Cl <sub>2</sub> | 7,4339 |
| 5,0                  | 0,3              | 4,0 | 0,4                      | 20,0             | 700                   | C <sub>2</sub> H <sub>4</sub> Cl <sub>2</sub> | 8,7979 |
| 20,0                 | 0,3              | 5,0 | 0,4                      | 35,0             | 700                   | CH <sub>2</sub> Cl <sub>2</sub>               | 7,8264 |
| 12,5                 | 0,2              | 4,5 | 0,7                      | 27,5             | 400                   | C <sub>2</sub> H <sub>4</sub> Cl <sub>2</sub> | 7,1129 |
| 12,5                 | 0,2              | 4,5 | 0,7                      | 27,5             | 400                   | CH <sub>2</sub> Cl <sub>2</sub>               | 6,8070 |
| 20,0                 | 0,1              | 5,0 | 0,4                      | 20,0             | 100                   | C <sub>2</sub> H <sub>4</sub> Cl <sub>2</sub> | 7,4550 |
| 5,0                  | 0,1              | 4,0 | 1,0                      | 35,0             | 700                   | CH <sub>2</sub> Cl <sub>2</sub>               | 7,2234 |
| 12,5                 | 0,2              | 4,5 | 0,7                      | 27,5             | 400                   | CH <sub>2</sub> Cl <sub>2</sub>               | 6,3805 |
| 20,0                 | 0,3              | 4,0 | 1,0                      | 20,0             | 100                   | CH <sub>2</sub> Cl <sub>2</sub>               | 7,2258 |
| 5,0                  | 0,3              | 5,0 | 1,0                      | 20,0             | 700                   | C <sub>2</sub> H <sub>4</sub> Cl <sub>2</sub> | 7,3768 |
| 20,0                 | 0,3              | 4,0 | 1,0                      | 35,0             | 100                   | C <sub>2</sub> H <sub>4</sub> Cl <sub>2</sub> | 8,0789 |
| 5,0                  | 0,1              | 5,0 | 1,0                      | 35,0             | 100                   | C <sub>2</sub> H <sub>4</sub> Cl <sub>2</sub> | 7,3751 |
| 20,0                 | 0,1              | 4,0 | 0,4                      | 35,0             | 700                   | C <sub>2</sub> H <sub>4</sub> Cl <sub>2</sub> | 8,4888 |
| 12,5                 | 0,2              | 4,5 | 0,7                      | 27,5             | 400                   | CH <sub>2</sub> Cl <sub>2</sub>               | 6,3082 |
| 5,0                  | 0,1              | 4,0 | 0,4                      | 20,0             | 100                   | CH <sub>2</sub> Cl <sub>2</sub>               | 6,5696 |
| 12,5                 | 0,2              | 4,5 | 0,7                      | 27,5             | 400                   | C <sub>2</sub> H <sub>4</sub> Cl <sub>2</sub> | 6,6906 |

S.Table 2. Box Behnken experimental design for the screening of Derivatization and LPME process.

| Agitation time (min) | pH  | Agitation speed (rpm) | Area   |
|----------------------|-----|-----------------------|--------|
| 18,8                 | 3,5 | 800                   | 5,1874 |
| 12,5                 | 4,5 | 600                   | 4,7809 |
| 12,5                 | 3,5 | 600                   | 4,9264 |
| 25,0                 | 4,5 | 600                   | 4,7140 |
| 18,8                 | 3,5 | 400                   | 5,5007 |
| 25,0                 | 4,0 | 400                   | 5,1155 |
| 12,5                 | 4,0 | 400                   | 4,5328 |
| 18,8                 | 4,0 | 600                   | 4,8193 |
| 25,0                 | 4,0 | 800                   | 4,9424 |
| 18,8                 | 4,0 | 600                   | 4,8566 |
| 18,8                 | 4,0 | 600                   | 4,7699 |
| 18,8                 | 4,0 | 600                   | 4,6437 |
| 18,8                 | 4,5 | 800                   | 4,7286 |
| 18,8                 | 4,5 | 400                   | 4,6138 |
| 12,5                 | 4,0 | 800                   | 5,0304 |
| 18,8                 | 4,0 | 600                   | 4,9107 |
| 25,0                 | 3,5 | 600                   | 5,2532 |
| 18,8                 | 4,0 | 600                   | 4,8001 |

S.Table 3. Central composite experimental design for the MAE process.

| Power (W) | Time (min) | Area   |
|-----------|------------|--------|
| 85,36     | 4          | 4,8969 |
| 25        | 6          | 4,8126 |
| 50        | 4          | 4,2724 |
| 75        | 6          | 5,0135 |
| 50        | 1,17       | 4,2066 |
| 50        | 4          | 4,2720 |
| 14,65     | 4          | 4,4034 |
| 50        | 4          | 4,3505 |
| 50        | 4          | 4,4074 |
| 25        | 2          | 4,5271 |
| 50        | 4          | 4,0598 |
| 50        | 6,83       | 4,5810 |
| 75        | 2          | 4,5138 |
